# Supplementary material
Source: publisher site journal article supplement (https://www.dovepress.com/article/567846)
Supplement: Supplementary file 1 [file 567846_Supplementary%20Material.docx]

**Supplementary Material**

**Table S1** **The top 10 authors by publication count and co-author citation count**

| Rank | Author | Publications | H_index | G_index | Co-Author | Citations | H_index | G_index |
| --- | --- | --- | --- | --- | --- | --- | --- | --- |
| 1 | JANSSEN DJA | 15 | 10 | 15 | PEDONE C | 554 | 11 | 11 |
| 2 | FEDERMAN AD | 15 | 9 | 15 | CORSONELLO A | 407 | 10 | 15 |
| 3 | WOUTERS EFM | 13 | 10 | 13 | WOUTERS EFM | 391 | 10 | 13 |
| 4 | JONES PW | 13 | 9 | 13 | FEDERMAN AD | 381 | 9 | 12 |
| 5 | CORSONELLO A | 12 | 9 | 12 | JANSSEN DJA | 369 | 9 | 15 |
| 6 | PEDONE C | 11 | 11 | 11 | CLEUTJENS FAHM | 242 | 7 | 10 |
| 7 | BROWN ES | 11 | 10 | 11 | PONDS RWHM | 242 | 7 | 8 |
| 8 | INCALZI RA | 10 | 9 | 10 | DIJKSTRA JB | 235 | 7 | 10 |
| 9 | KHAN DA | 10 | 9 | 10 | SPRUIT MA | 227 | 7 | 13 |
| 10 | FRIED TR | 9 | 9 | 9 | FRANSSEN FME | 199 | 6 | 11 |

The H-index is derived from the number of citations of a scholar's published papers. It is an indicator that can measure the scholar's output and influence, and focuses on the balance between academic output and influence. The G-index emphasizes the contribution of highly cited papers and can more sensitively reflect the scholar's overall academic influence.

**Table S2 Top 10 seminal references.**

| Rank | Title | Year | Citations | IF | JCR | First author |
| --- | --- | --- | --- | --- | --- | --- |
| 1 | Cognitive function in COPD | 2010 | 304 | 16.6 | 1 | [JW Dodd](https://scholar.google.com.hk/citations?user=__UrKmoAAAAJ&hl=zh-CN&oi=sra) |
| 2 | Mild Cognitive Impairment in Moderate to Severe COPD: A Preliminary Study | 2012 | 144 | 9.5 | 1 | [S Villeneuve](https://scholar.google.com.hk/citations?user=SCIotuMAAAAJ&hl=zh-CN&oi=sra) |
| 3 | Brain perfusion abnormalities in chronic obstructive pulmonary disease: comparison with cognitive impairment | 2006 | 108 | 2.5 | 2 | H Ortapamuk |
| 4 | Cognitive dysfunction in patients hospitalized with acute exacerbation of COPD | 2013 | 102 | 9.5 | 1 | [JW Dodd](https://scholar.google.com.hk/citations?user=__UrKmoAAAAJ&hl=zh-CN&oi=sra) |
| 5 | Cognitive decline among patients with chronic obstructive pulmonary disease | 2009 | 140 | 19.3 | 1 | WW Hung |
| 6 | Drawing impairment predicts mortality in severe COPD | 2006 | 109 | 9.5 | 1 | AI Raffaele |
| 7 | Brain structure and function in chronic obstructive pulmonary disease: a multimodal cranial magnetic resonance imaging study | 2012 | 111 | 19.3 | 1 | [JW Dodd](https://scholar.google.com.hk/citations?user=__UrKmoAAAAJ&hl=zh-CN&oi=sra) |
| 8 | Cognitive dysfunction in patients with chronic obstructive pulmonary disease--a systematic review | 2012 | 110 | 3.5 | 2 | [L Schou](https://scholar.google.com.hk/citations?user=UcF8W2UAAAAJ&hl=zh-CN&oi=sra) |
| 9 | Lung disease as a determinant of cognitive decline and dementia | 2015 | 129 | 8.0 | 1 | [JW Dodd](https://scholar.google.com.hk/citations?user=__UrKmoAAAAJ&hl=zh-CN&oi=sra) |
| 10 | Effect of coexisting chronic obstructive pulmonary disease and cognitive impairment on health outcomes in older adults | 2012 | 73 | 4.3 | 1 | SS Chang |

**Table S3 ROB 2 Evaluation**

| Title | Author, Year | 1 | 2 | 3 | 4 | 5 |
| --- | --- | --- | --- | --- | --- | --- |
| 1 | Song F, 2025 | Low risk | Some concerns | Some concerns | Low risk | Low risk |
| 2 | Momeni Safarabadi A, 2024 | Some concerns | Some concerns | Low risk | Some concerns | Some concerns |
| 3 | Tabka O, 2023 | Low risk | Some concerns | Low risk | Low risk | Some concerns |
| 4 | Kaya M, 2022 | Some concerns | Low risk | Some concerns | Low risk | Some concerns |
| 5 | Cheng YY, 2022 | Some concerns | Some concerns | Some concerns | Low risk | Low risk |
| 6 | Aquino G, 2016 | Some concerns | Some concerns | Low risk | Low risk | Some concerns |
| 7 | Pretto JJ, 2008 | Low risk | Low risk | Low risk | Low risk | Low risk |
| 8 | Guo-ying , Qian , 2022 | Some concerns | Some concerns | Low risk | Low risk/Some concerns | Some concerns |
| 9 | Charles F. Emery，1998 | Low risk | Some concerns | Some concerns | Low risk/Some concerns | Some concerns |
| 10 | Kim L. Lavoie， 2019 | Some concerns | Some concerns | Some concerns | Some concerns | Some concerns |
| 11 | Rosenstein B, 2020 | Low risk | Low risk | Some concerns | Low risk | Some concerns |
| 12 | Etnier JL, 2001 | Some concerns | Low risk | Some concerns | Low risk | Some concerns |
| 13 | Kozora, E., 2002 | Some concerns | Some concerns | Low risk | Low risk | Some concerns |
| 14 | Lone Schou, PhD, 2014 | Low risk | Some concerns | Low risk | Some concerns | Low risk |
| 15 | Joe W Ramsdell, 1996 | Some concerns | Low risk | Some concerns | Low risk | Some concerns |

**Search strategy used was as follows:**

#1= (((( ( ( (Cognitive Dysfunction[MeSH Terms]) OR (Cognitive Dysfunction) ) OR (Mild cognitive impairment) ) OR (MCI) ) OR (Subtle cognitive impairment) ) OR (Mildly cognitively impaired) ) OR (Dement*) ) OR (Alzheimer*))

#2=(((((((((((Pulmonary Disease[MeSH Terms]) OR (Chronic Obstructive[MeSH Terms])) OR (Bronchitis, Chronic[MeSH Terms])) OR (COPD[Title/Abstract])) OR (COAD[Title/Abstract])) OR (COBD[Title/Abstract])) OR (AECOPD[Title/Abstract])) OR (obstructive pulmonary[Title/Abstract])) OR (obstructive lung[Title/Abstract])) OR (obstructive airway[Title/Abstract])) OR (obstructive airflow[Title/Abstract])) OR (obstructive bronch*[Title/Abstract])) OR (obstructive respirat*[Title/Abstract]))

Final keywords query: #1 AND #2
